# Supplementary material
Source: HighWire-hosted journal article supplement (https://bmjophth.bmj.com/content/8/1/e001330)
Supplement: inline-supplementary-material-2 [file inline-supplementary-material-2.pdf]

**Supplementary table 2.** Distribution of journals in Bradford's zones.

| Bradford Zone | No. of Journals | No. of Articles | % of Journals | Mean No. of Articles |
|---------------|-----------------|-----------------|---------------|----------------------|
| 1             | 17              | 8696            | 7.27          | 511                  |
| 2             | 115             | 8428            | 4.92          | 73                   |
| 3             | 2226            | 8321            | 9.53          | 4                    |
| Total         | 2337            | 26195           | 100           | 11                   |
